# Supplementary material for: The structural fate of lipid nanoparticles in the extracellular matrix
Source: Royal Society of Chemistry journal article supplement (doi:10.1039/c9mh00835g), 2019-07-31
Supplement: c9mh00835g1.pdf [file c9mh00835g1.pdf]

# Electronic Supplementary Information

## The structural fate of lipid nanoparticles in the extracellular matrix

Sarith R. Bandara<sup>a</sup>, Thomas G. Molley<sup>b</sup>, Hojun Kim<sup>c</sup>, Priyalini A. Bharath<sup>a</sup>, Kristopher A. Kilian<sup>\*b</sup>, and  
Cecilia Leal<sup>\*a</sup>

<sup>a</sup>Department of Materials Science and Engineering, University of Illinois at Urbana-Champaign, Urbana,  
Illinois 61801, United States

<sup>b</sup>School of Chemistry, School of Materials Science and Engineering, Australian Centre for Nanomedicine,  
University of New South Wales, Sydney NSW 2052, Australia

<sup>c</sup>Center for Biomaterials, Biomedical Research Institute, Korea Institute of Science and Technology  
(KIST), Seoul 02792, Republic of Korea

\*Correspondence should be addressed to Cecilia Leal (email: [cecilial@illinois.edu](mailto:cecilial@illinois.edu)) and/or Kristopher A.  
Kilian (email: [k.kilian@unsw.edu.au](mailto:k.kilian@unsw.edu.au))

## SAXS, confocal microscopy, and cryo-EM data of DOPC liposomes

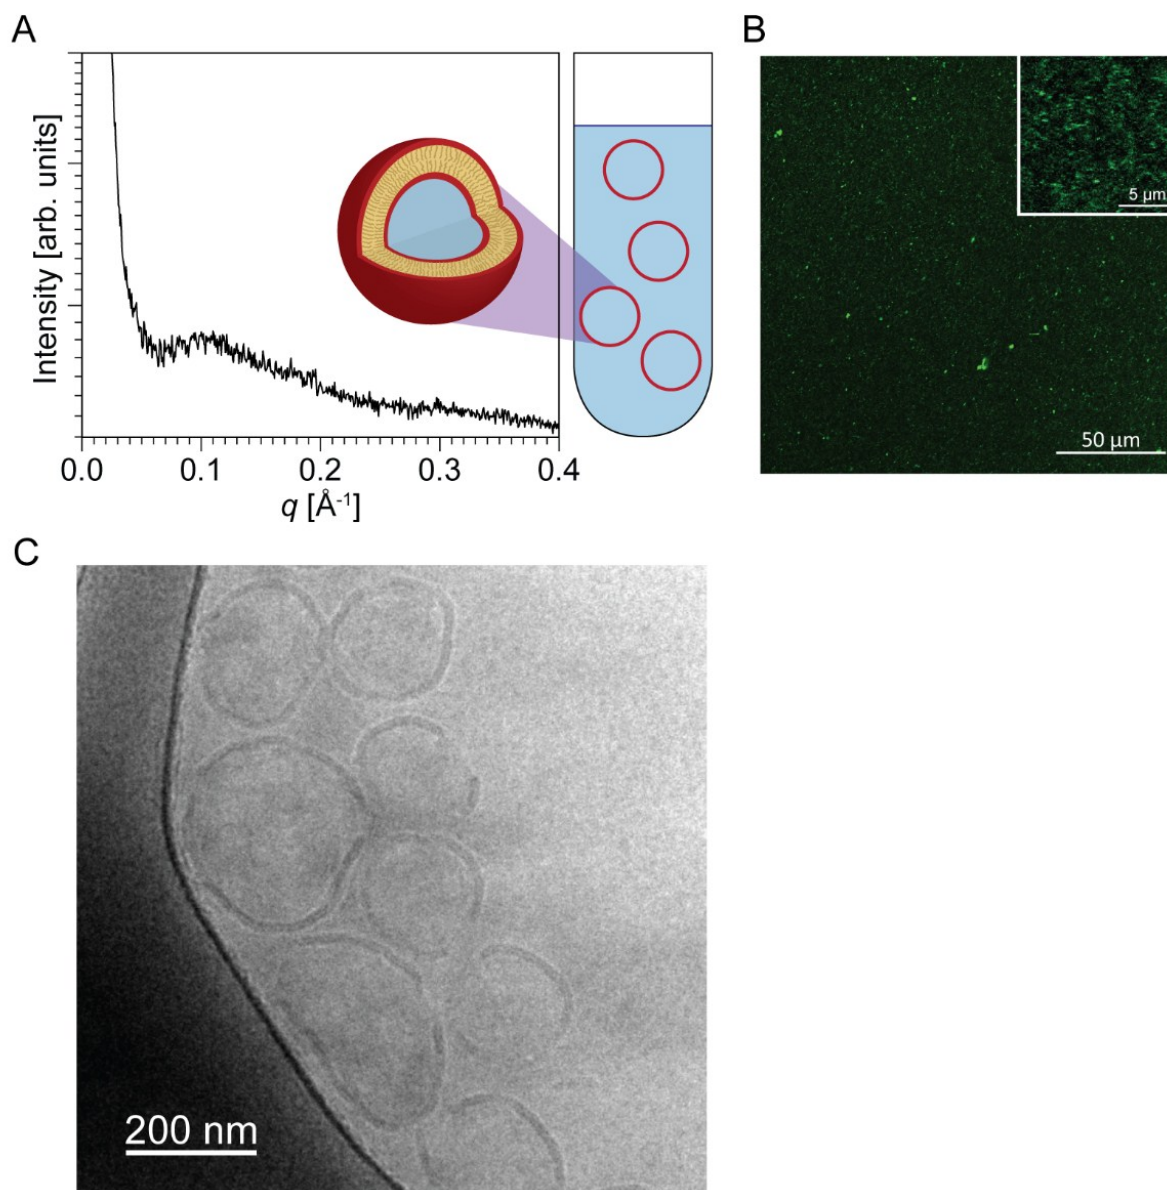

**Figure S1.** (A) SAXS data of DOPC liposomes display the characteristic form factor of a single lipid bilayer. A schematic representation to the right of the SAXS data depicts liposomes in a quartz capillary. (B) Confocal microscopy of the DOPC liposomes displays a green haze. The inset is at a higher magnification. (C) A cryo-EM image of liposomes displays unilamellar vesicles 100-200 nm in diameter.

## SAXS and cryo-EM data of PEG

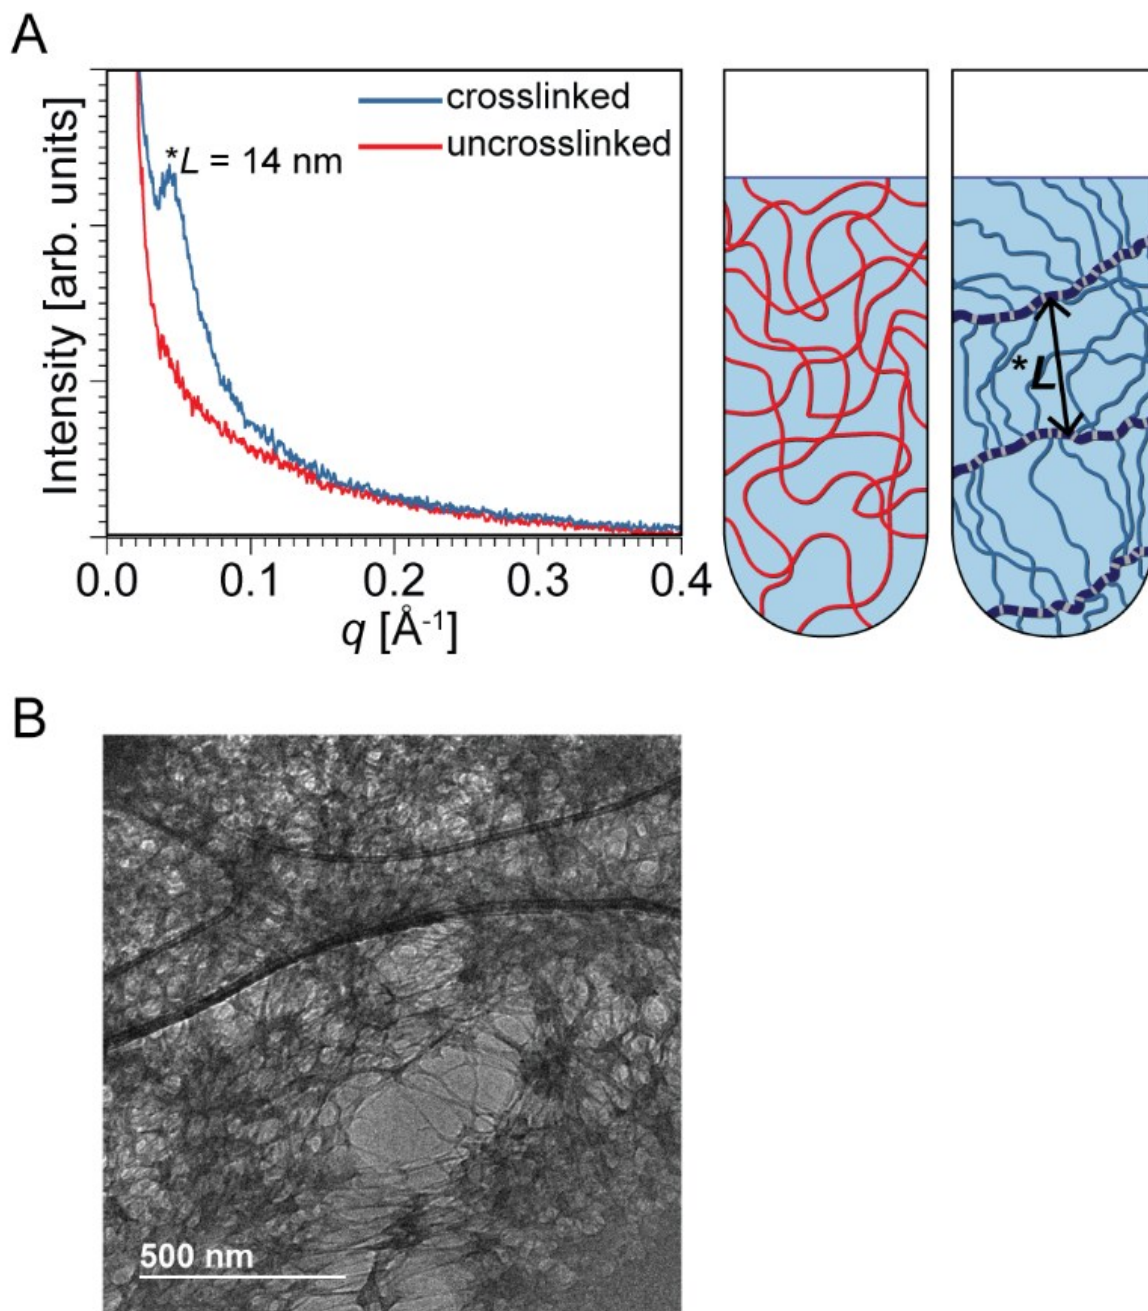

**Figure S2.** (A) SAXS data of crosslinked PEG (blue) display a broad peak at  $q = 0.044 \text{ \AA}^{-1}$  that is absent in the SAXS data of uncrosslinked PEG (red). The correlation length of crosslinked PEG  $*L = 14$  nm. A schematic representation to the right of the SAXS data depicts uncrosslinked and crosslinked PEG in quartz capillaries. (B) A cryo-EM image of uncrosslinked PEG shows a network of polymer.

## Effect of PAM stiffness on PAM swelling ratio and lipid restructuring

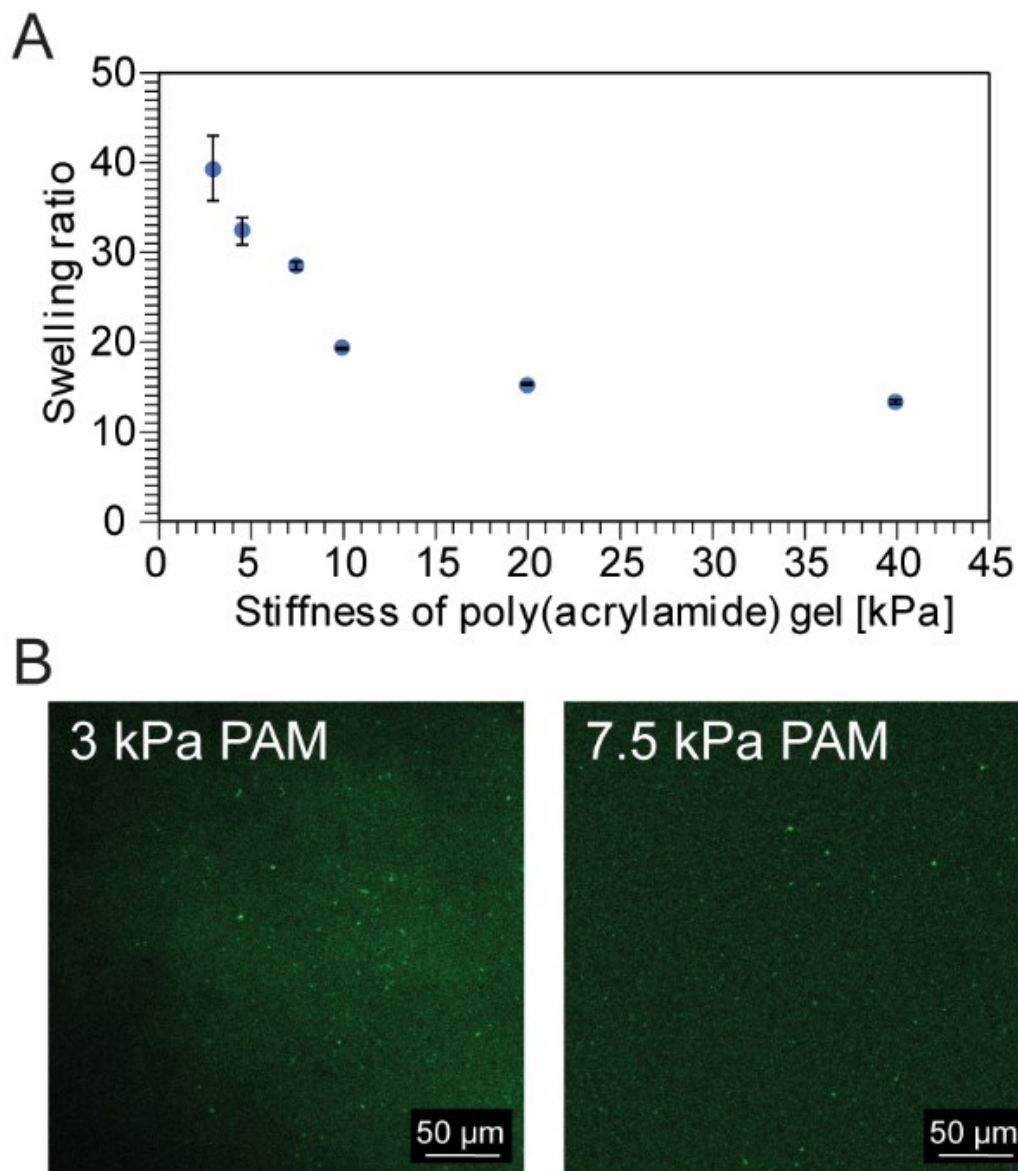

**Figure S3.** (A) Increasing the stiffness of PAM (by varying relative concentrations of acrylamide and bis-acrylamide as described by Tse and Engler)<sup>1</sup> decreases the swelling ratio (standard deviations shown,  $n = 5$ ). (B) Confocal microscopy of DOPC liposomes in 3 kPa and 7 kPa PAM displays a green haze similar to that observed with just liposomes.

## References

- (1) Tse, J. R.; Engler, A. J. Preparation of Hydrogel Substrates with Tunable Mechanical Properties. *Curr. Protoc. Cell Biol.* **2010**, No. SUPPL. 47, 1–16. <https://doi.org/10.1002/0471143030.cb1016s47>.
